# Supplementary material for: Combination of support vector regression (SVR) and microwave plasma atomic emission spectrometry (MWP-AES) for quantitative elemental analysis in solid samples using the continuous direct solid sampling (CDSS) technique
Source: Royal Society of Chemistry journal article supplement (doi:10.1039/c8ja00219c), 2018-01-01
Supplement: c8ja00219c1.pdf [file c8ja00219c1.pdf]

Combination of Supporting Vector Regression (SVR) and Microwave Plasma Atomic Emission Spectrometry (MWP-AES) for the Quantitative Elemental Analysis in Solid Samples Using Continuous Direct Solid Sampling (CDSS) Technique

Guanghai Niu<sup>a</sup>, Qi Shi<sup>b</sup>, Xin Yuan<sup>b</sup>, Jie Wang<sup>a</sup>, Xu Wang<sup>c</sup>, Yixiang Duan<sup>b</sup>

<sup>a</sup>*School of Aeronautics and Astronautics, Research Center of Analytical Instrumentation, Sichuan University, Chengdu, China*

<sup>b</sup>*Research Center of Analytical Instrumentation, Key Laboratory of Bio-resource and Eco-environment, Ministry of Education, College of Life Sciences, Sichuan University, Chengdu, 610064, China*

<sup>c</sup>*Research Center of Analytical Instrumentation, School of Manufacturing Science and Engineering, Sichuan University, Chengdu, China*

\*Correspondence to: Dr. Yixiang Duan, Research Center of Analytical Instrumentation, College of Life Sciences, Sichuan University, Chengdu 610064, China

E-mail: [yduan@scu.edu.cn](mailto:yduan@scu.edu.cn) Phone: 028-85418180 Fax: 028-85418180

## **Table of content**

1. Elemental information of the testing samples
2. Instrumental parameters investigated in the experiment
3. Selection of the optimal spectral collecting time
4. Influence of Ar flow rate on the normalized intensity of Cu, Pb and Cr
5. Influence of microwave output power on the normalized intensity of Cu, Pb and Cr
6. PCA analysis results
7. Spectral loadings for the first 5 principal components

1.

Table S1 Elemental information of the testing samples

| No. | Sample 1 | Sample 2 | Ratio | Pb ( $\mu\text{g/g}$ ) | Cu ( $\mu\text{g/g}$ ) | Cr ( $\mu\text{g/g}$ ) | C <sub>org</sub> (%) | As ( $\mu\text{g/g}$ ) | Cd ( $\mu\text{g/g}$ ) | Zn ( $\mu\text{g/g}$ ) |
|-----|----------|----------|-------|------------------------|------------------------|------------------------|----------------------|------------------------|------------------------|------------------------|
| 1   | GSS-14   | GSS-7    | 1:1   | 22.50                  | 62.20                  | 240.00                 | 0.72                 | 5.65                   | 0.14                   | 119.00                 |
| 2   | GSS-14   | GSS-7    | 1:2   | 19.67                  | 73.80                  | 296.67                 | 0.69                 | 5.37                   | 0.11                   | 126.67                 |
| 3   | GSS-14   | GSS-7    | 1:3   | 18.25                  | 79.60                  | 325.00                 | 0.68                 | 5.23                   | 0.10                   | 130.50                 |
| 4   | GSS-14   | GSS-7    | 1:4   | 17.40                  | 83.08                  | 342.00                 | 0.67                 | 5.14                   | 0.10                   | 132.80                 |
| 5   | GSS-14   | GSS-7    | 1:5   | 16.83                  | 85.40                  | 353.33                 | 0.67                 | 5.08                   | 0.09                   | 134.33                 |
| 6   | GSS-14   | GSS-7    | 1:6   | 16.43                  | 87.06                  | 361.43                 | 0.66                 | 5.04                   | 0.09                   | 135.43                 |
| 7   | GSS-14   | GSS-7    | 2:1   | 25.33                  | 50.60                  | 183.33                 | 0.74                 | 5.93                   | 0.16                   | 111.33                 |
| 8   | GSS-14   | GSS-7    | 3:1   | 26.75                  | 44.80                  | 155.00                 | 0.75                 | 6.08                   | 0.17                   | 107.50                 |
| 9   | GSS-14   | GSS-7    | 4:1   | 27.60                  | 41.32                  | 138.00                 | 0.76                 | 6.16                   | 0.17                   | 105.20                 |
| 10  | GSS-14   | GSS-7    | 5:1   | 28.17                  | 39.00                  | 126.67                 | 0.77                 | 6.22                   | 0.18                   | 103.67                 |
| 11  | GSS-14   | GSS-7    | 6:1   | 28.57                  | 37.34                  | 118.57                 | 0.77                 | 6.26                   | 0.18                   | 102.57                 |
| 12  | GSS-2    | GSS-6    | 1:1   | 167.00                 | 203.15                 | 61.00                  | 0.65                 | 116.85                 | 0.11                   | 69.50                  |
| 13  | GSS-2    | GSS-6    | 1:2   | 216.00                 | 265.43                 | 65.67                  | 0.70                 | 151.23                 | 0.11                   | 78.67                  |
| 14  | GSS-2    | GSS-6    | 1:3   | 240.50                 | 296.58                 | 68.00                  | 0.73                 | 168.43                 | 0.12                   | 83.25                  |
| 15  | GSS-2    | GSS-6    | 1:4   | 255.20                 | 315.26                 | 69.40                  | 0.75                 | 178.74                 | 0.12                   | 86.00                  |
| 16  | GSS-2    | GSS-6    | 1:5   | 265.00                 | 327.72                 | 70.33                  | 0.76                 | 185.62                 | 0.12                   | 87.83                  |
| 17  | GSS-2    | GSS-6    | 1:6   | 272.00                 | 336.61                 | 71.00                  | 0.76                 | 190.53                 | 0.12                   | 89.14                  |
| 18  | GSS-2    | GSS-6    | 2:1   | 118.00                 | 140.87                 | 56.33                  | 0.60                 | 82.47                  | 0.10                   | 60.33                  |
| 19  | GSS-2    | GSS-6    | 3:1   | 93.50                  | 109.73                 | 54.00                  | 0.57                 | 65.28                  | 0.09                   | 55.75                  |
| 20  | GSS-2    | GSS-6    | 4:1   | 78.80                  | 91.04                  | 52.60                  | 0.55                 | 54.96                  | 0.09                   | 53.00                  |
| 21  | GSS-2    | GSS-6    | 5:1   | 69.00                  | 78.58                  | 51.67                  | 0.54                 | 48.08                  | 0.09                   | 51.17                  |
| 22  | GSS-2    | GSS-6    | 6:1   | 62.00                  | 69.69                  | 51.00                  | 0.54                 | 43.17                  | 0.09                   | 49.86                  |
| 23  | GSS-3    | GSS-8    | 1:1   | 23.50                  | 17.85                  | 50.00                  | 0.41                 | 2.23                   | 0.10                   | 49.50                  |
| 24  | GSS-3    | GSS-8    | 1:2   | 22.67                  | 20.00                  | 56.00                  | 0.37                 | 1.51                   | 0.11                   | 55.67                  |
| 25  | GSS-3    | GSS-8    | 1:3   | 22.25 <sup>a</sup>     | 21.08                  | 59.00                  | 0.35                 | 1.15                   | 0.11                   | 58.75                  |
| 26  | GSS-3    | GSS-8    | 1:4   | 22.00                  | 21.72 <sup>a</sup>     | 60.80                  | 0.34                 | 0.93                   | 0.12                   | 60.60                  |
| 27  | GSS-3    | GSS-8    | 1:5   | 21.83                  | 22.15                  | 62.00                  | 0.34                 | 0.78                   | 0.12                   | 61.83                  |
| 28  | GSS-3    | GSS-8    | 1:6   | 21.71                  | 22.46                  | 62.86                  | 0.33                 | 0.68                   | 0.12                   | 62.71                  |
| 29  | GSS-3    | GSS-8    | 2:1   | 24.33                  | 15.70                  | 44.00                  | 0.44                 | 2.95                   | 0.08                   | 43.33                  |
| 30  | GSS-3    | GSS-8    | 3:1   | 24.75                  | 14.63                  | 41.00                  | 0.46                 | 3.32                   | 0.08                   | 40.25                  |
| 31  | GSS-3    | GSS-8    | 4:1   | 25.00                  | 13.98                  | 39.20                  | 0.47                 | 3.53                   | 0.07                   | 38.40                  |
| 32  | GSS-3    | GSS-8    | 5:1   | 25.17 <sup>a</sup>     | 13.55                  | 38.00                  | 0.48 <sup>a</sup>    | 3.68                   | 0.07                   | 37.17                  |
| 33  | GSS-3    | GSS-8    | 6:1   | 25.29                  | 13.24                  | 37.14                  | 0.48                 | 3.78                   | 0.07                   | 36.29                  |
| 34  | Mudstone | GSS-6    | 1:1   | 157.00                 | 212.40                 | 67.45                  | 0.41                 | 110.00                 | 0.11                   | 48.50                  |
| 35  | Mudstone | GSS-6    | 2:1   | 104.67                 | 153.20                 | 64.93                  | 0.27                 | 73.33                  | 0.10                   | 32.33                  |
| 36  | Mudstone | GSS-6    | 3:1   | 78.50                  | 123.60                 | 63.68                  | 0.20                 | 55.00                  | 0.10                   | 24.25                  |
| 37  | Mudstone | GSS-6    | 4:1   | 62.80                  | 105.84                 | 62.92 <sup>a</sup>     | 0.16                 | 44.00                  | 0.10                   | 19.40                  |
| 38  | Mudstone | GSS-6    | 5:1   | 52.33                  | 94.00                  | 62.42                  | 0.14                 | 36.67                  | 0.10                   | 16.17                  |
| 39  | Mudstone | GSS-6    | 6:1   | 44.86                  | 85.54                  | 62.06                  | 0.12                 | 31.43                  | 0.10                   | 13.86                  |
| 40  | Mudstone | GSS-6    | 7:1   | 39.25                  | 79.20                  | 61.79                  | 0.10                 | 27.50                  | 0.10                   | 12.13                  |
| 41  | Mudstone | GSS-6    | 8:1   | 34.89                  | 74.27                  | 61.58                  | 0.09                 | 24.44                  | 0.09                   | 10.78                  |
| 42  | Mudstone | GSS-6    | 9:1   | 31.40                  | 70.32                  | 61.41 <sup>a</sup>     | 0.08                 | 22.00                  | 0.09                   | 9.70                   |
| 43  | Mudstone | GSS-6    | 10:1  | 28.55                  | 67.09                  | 61.27                  | 0.07                 | 20.00                  | 0.09                   | 8.82                   |

<sup>a</sup> Samples with elemental contents marked with <sup>a</sup> were selected as validation dataset.

**2.**

Table S2 Instrumental parameters investigated in this experiment

| Instrumental parameters               | Applied range    |
|---------------------------------------|------------------|
| Microwave Frequency (MHz)             | 2450             |
| Microwave Power (W)                   | 53~120           |
| Argon Flow Rate (mL/min)              | 150~350          |
| Inner Diameter of Discharge Tube (mm) | 1                |
| Spectral Range                        | 175~605 nm       |
| Entrance Slit Width                   | 10 $\mu\text{m}$ |
| CCD Integration Time                  | 50 ms            |
| CCD Average                           | 1                |

3.

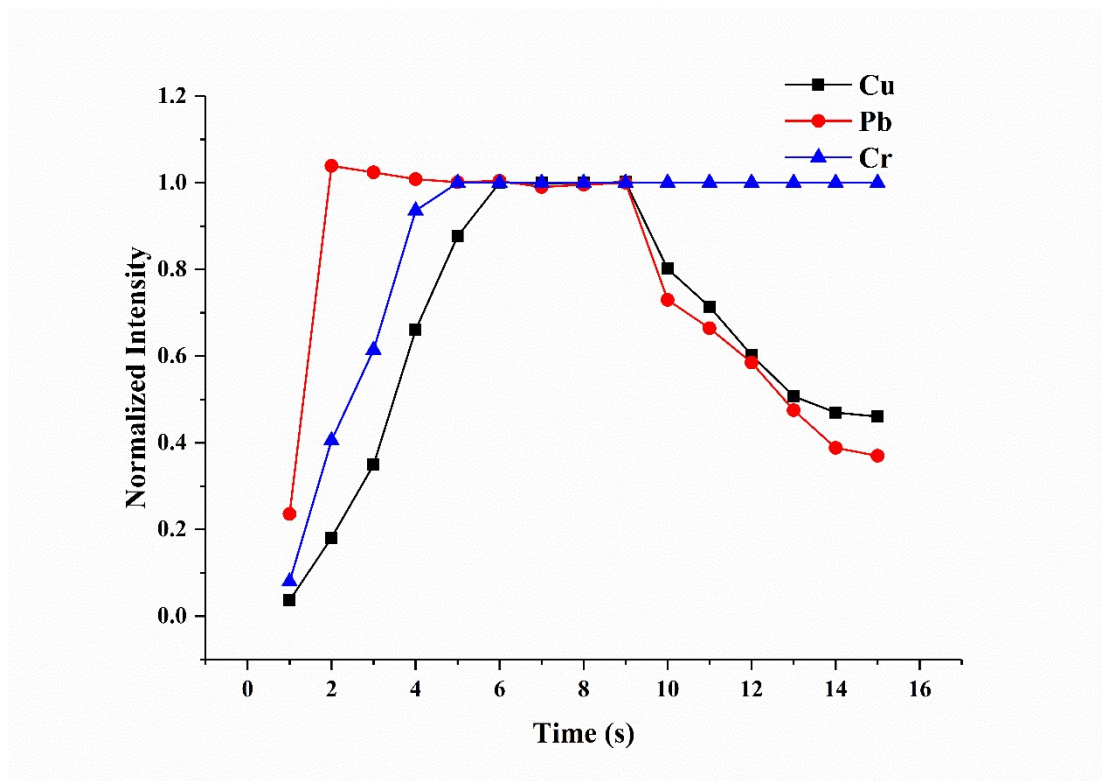

Fig. S1 Selection of the optimal spectral collecting time (Ar flow rate: 200 mL/min, microwave output power: 120 W)

4.

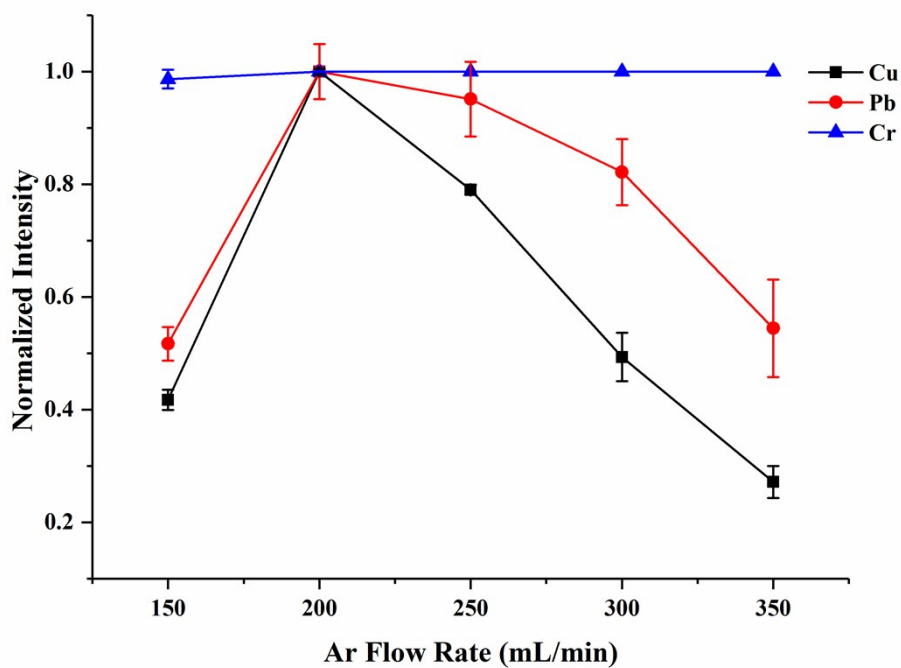

Fig. S2 Influence of Ar flow rate on the normalized intensity of Cu, Pb and Cr (Sample: GSS-5, microwave output power: 120 W)

5.

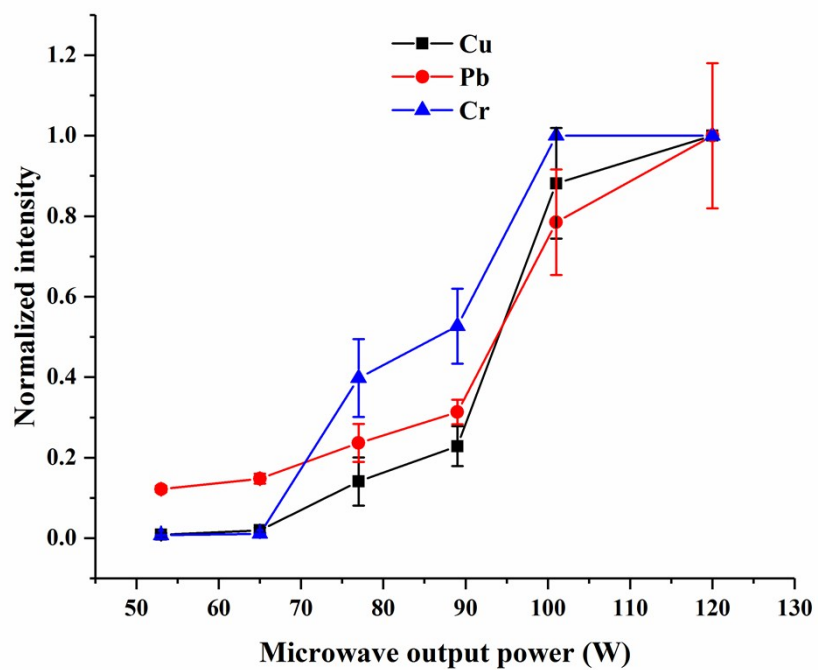

Fig. S3 Influence of microwave output power on the normalized intensity of Cu, Pb and Cr (Sample: GSS-5, Ar flow rate: 200 mL/min)

6.

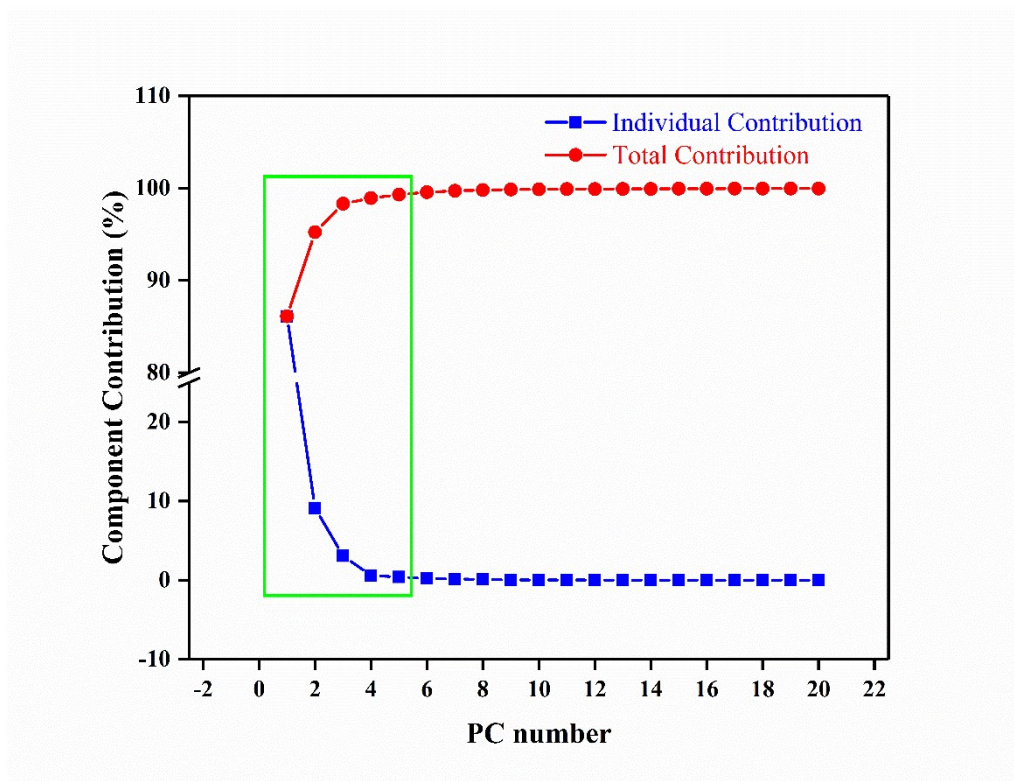

Fig. S4 PCA analysis result



7.

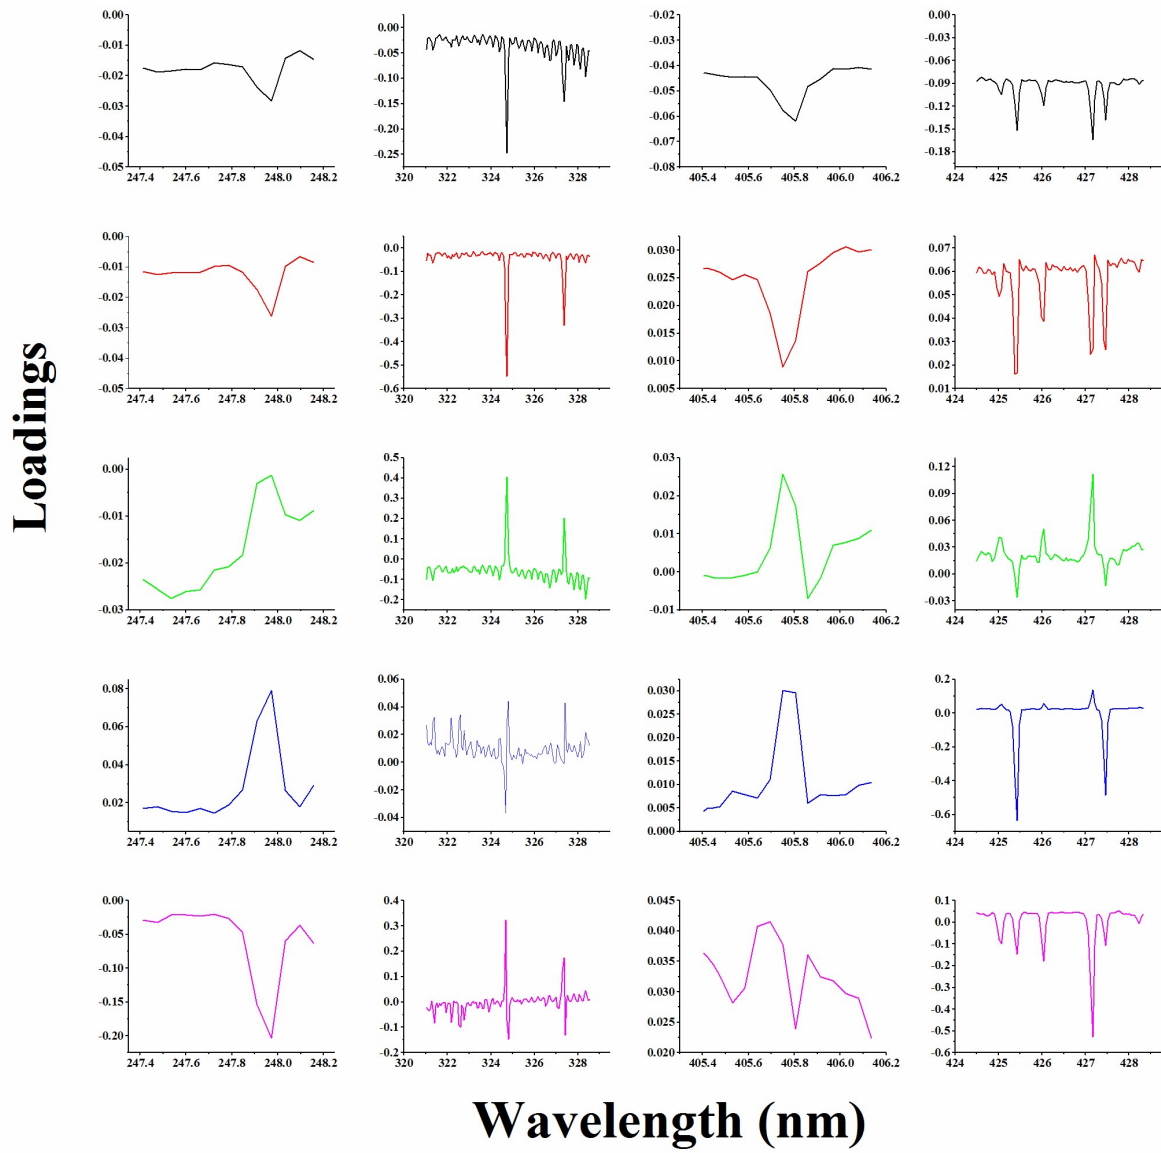

Fig. S5 Spectral loadings for the first five PCs
